# Supplementary material
Source: ML conference proceedings conference paper supplement (https://openaccess.thecvf.com/content/ICCV2023/html/Guan_Revisit_PCA-based_Technique_ICCV_2023_paper.html)
Supplement: Supplementary file 1 [file Guan_Revisit_PCA-based_Technique_ICCV_2023_supplemental.pdf]

# Revisit PCA-based technique for Out-of-distribution Detection

Xiaoyuan Guan<sup>1,3\*</sup>    Zhouwu Liu<sup>1,3\*</sup>    Wei-Shi Zheng<sup>1,3</sup>    Yuren Zhou<sup>1†</sup>  
Ruixuan Wang<sup>1,2,3†</sup>

<sup>1</sup>School of Computer Science and Engineering, Sun Yat-sen University, Guangzhou, China

<sup>2</sup>Peng Cheng Laboratory, Shenzhen, China

<sup>3</sup>Key Laboratory of Machine Intelligence and Advanced Computing, MOE, Guangzhou, China

{guanxy36,liuzhw33}@mail2.sysu.edu.cn, wszheng@ieee.org, {zhouyuren,wangruix5}@mail.sysu.edu.cn

## A. Dataset details

### Dataset details in benchmark I and II

**ImageNet-100.** We use the following categories that are randomly sampled from ImageNet-1K to create ImageNet-100: n01986214, n04200800, n03680355, n03208938, n02963159, n03874293, n02058221, n04612504, n02841315, n02099712, n02093754, n03649909, n02114712, n03733281, n02319095, n01978455, n04127249, n07614500, n03595614, n04542943, n02391049, n04540053, n03483316, n03146219, n02091134, n02870880, n04479046, n03347037, n02090379, n10148035, n07717556, n04487081, n04192698, n02268853, n02883205, n02002556, n04273569, n02443114, n03544143, n03697007, n04557648, n02510455, n03633091, n02174001, n02077923, n03085013, n03888605, n02279972, n04311174, n01748264, n02837789, n07613480, n02113712, n02137549, n02111129, n01689811, n02099601, n02085620, n03786901, n04476259, n12998815, n04371774, n02814533, n02009229, n02500267, n04592741, n02119789, n02090622, n02132136, n02797295, n01740131, n02951358, n04141975, n02169497, n01774750, n02128757, n02097298, n02085782, n03476684, n03095699, n04326547, n02107142, n02641379, n04081281, n06596364, n03444034, n07745940, n03876231, n09421951, n02672831, n03467068, n01530575, n03388043, n03991062, n02777292, n03710193, n09256479, n02443484, n01728572, n03903868.

We use the following OOD test data in ImageNet-1K and ImageNet-100 benchmark. The selected categories are disjoint with ImageNet-1K.

**iNaturalist:** iNaturalist contains 675,170 training and validation images from 5089 natural fine-grained cate-

gories, including 13 major categories such as plants, insects, birds, and mammals. We randomly sample 10000 images that are disjoint from ImageNet-1k for evaluation.

**SUN:** The Scene UNDERstanding (SUN) contains 397 well-sampled categories to evaluate the performance of scene recognition algorithms. We randomly sample 10000 images that are disjoint from ImageNet-1k for evaluation.

**Places:** Places is a scene image dataset, which contains 10 million pictures and more than 400 different types of scene environments. We randomly sample 10000 images that are disjoint from ImageNet-1k for evaluation.

**Textures:** Describable Textures Dataset (DTD) is a texture dataset, including 5640 images, which can be divided into 47 categories according to human perception. We use the entire Textures dataset for evaluation.

### Dataset details in CIFAR benchmark

For CIFAR benchmarks, we use the following OOD test dataset: **SVHN:** Street View House Number (SVHN) consists of the house numbers extracted from Google Street View images. We use the entire of its test set as OOD examples (26032 images).

**Tiny ImageNet:** Similar to ImageNet, Tiny ImageNet is an image classification dataset, which contains 200 categories, and each category contains 50 test images.

**LSUN:** LSUN is a scene understanding dataset, which mainly includes scene images of bedrooms, fixed houses, living rooms, classrooms, etc. We randomly sample 10000 images as out-of-distribution examples.

**Textures:** Describable Textures Dataset (DTD) is a texture dataset, including 5640 images, which can be divided into 47 categories according to human perception. We use the entire Textures dataset for evaluation.

**iSUN:** iSUN is a large-scale eye tracking dataset which contains 20608 natural scene images from the SUN database. We sample 8925 images with no conceptual overlap with CIFAR as out-of-distribution examples.

**Places365:** It contains large-scale photographs of scenes

\* Authors contributed equally

† Corresponding author

Table 1. Detailed results when using CIFAR-10 as ID data on seven common OOD benchmark datasets.  $\uparrow$  indicates larger values are better and  $\downarrow$  indicates smaller values are better

| OOD datasets         | Metrics                    | Out-of-distribution Detection Methods |             |       |       |       |        |       |       |            |           |       |       |       |
|----------------------|----------------------------|---------------------------------------|-------------|-------|-------|-------|--------|-------|-------|------------|-----------|-------|-------|-------|
|                      |                            | MSP                                   | Mahalanobis | ODIN  | DICE  | ViM   | Energy | BATS  | ReAct | DICE+ReAct | LogitNorm | Ours  |       |       |
| CIFAR-10<br>ResNet34 | SVHN                       | FPR95                                 | 33.79       | 41.38 | 43.80 | 36.67 | 29.66  | 20.65 | 26.37 | 24.19      | 38.22     | 17.40 | 11.22 |       |
|                      |                            | AUROC                                 | 94.18       | 94.10 | 86.52 | 90.64 | 95.06  | 95.25 | 94.75 | 94.40      | 90.64     | 96.96 | 98.02 |       |
|                      | Tiny-ImageNet              | FPR95                                 | 32.13       | 86.48 | 14.21 | 14.79 | 54.27  | 12.85 | 21.25 | 14.72      | 15.09     | 3.52  | 3.03  |       |
|                      |                            | AUROC                                 | 95.23       | 87.68 | 97.68 | 97.22 | 92.44  | 97.91 | 96.25 | 97.56      | 97.21     | 99.17 | 99.32 |       |
|                      | LSUN-R                     | FPR95                                 | 42.62       | 52.67 | 23.66 | 35.13 | 38.13  | 25.64 | 30.02 | 26.69      | 34.83     | 11.04 | 13.69 |       |
|                      |                            | AUROC                                 | 92.31       | 92.54 | 93.70 | 92.79 | 94.00  | 94.13 | 93.72 | 94.16      | 92.79     | 97.92 | 97.59 |       |
|                      | LSUN-C                     | FPR95                                 | 20.47       | 92.99 | 7.03  | 6.67  | 49.00  | 5.32  | 10.67 | 6.72       | 6.67      | 0.48  | 0.34  |       |
|                      |                            | AUROC                                 | 96.86       | 88.48 | 98.74 | 98.70 | 93.84  | 99.05 | 98.30 | 98.87      | 98.70     | 99.80 | 99.90 |       |
|                      | iSUN                       | FPR95                                 | 45.17       | 52.26 | 26.03 | 40.95 | 37.49  | 28.17 | 32.47 | 29.18      | 40.95     | 11.39 | 13.46 |       |
|                      |                            | AUROC                                 | 91.71       | 92.41 | 93.18 | 90.92 | 93.84  | 93.46 | 92.90 | 93.46      | 89.92     | 97.86 | 97.56 |       |
|                      | Textures                   | FPR95                                 | 49.95       | 38.95 | 45.73 | 50.73 | 28.19  | 38.83 | 37.71 | 39.50      | 50.73     | 31.51 | 22.09 |       |
|                      |                            | AUROC                                 | 89.66       | 94.24 | 83.19 | 86.60 | 94.94  | 88.91 | 91.71 | 89.33      | 87.17     | 94.71 | 96.18 |       |
|                      | Places365                  | FPR95                                 | 53.69       | 55.89 | 52.08 | 49.65 | 47.58  | 41.49 | 41.84 | 40.30      | 49.67     | 29.90 | 27.56 |       |
|                      |                            | AUROC                                 | 87.84       | 90.19 | 82.55 | 84.70 | 90.78  | 88.26 | 90.27 | 89.55      | 84.72     | 94.31 | 94.54 |       |
|                      | Average                    | FPR95                                 | 39.69       | 60.09 | 30.37 | 33.51 | 40.62  | 24.71 | 28.62 | 25.90      | 33.74     | 15.03 | 13.06 |       |
|                      |                            | AUROC                                 | 92.54       | 91.38 | 90.79 | 91.65 | 93.56  | 93.85 | 93.98 | 93.90      | 91.65     | 97.25 | 97.59 |       |
|                      | CIFAR10<br>WideResNet28-10 | SVHN                                  | FPR95       | 45.43 | 83.53 | 51.98 | 48.99  | 12.85 | 35.61 | 39.91      | 36.07     | 47.16 | 24.31 | 19.26 |
|                      |                            |                                       | AUROC       | 90.36 | 80.05 | 81.79 | 83.18  | 97.32 | 89.80 | 91.50      | 90.03     | 86.74 | 95.75 | 96.77 |
|                      |                            | Tiny-ImageNet                         | FPR95       | 24.61 | 99.38 | 8.77  | 0.84   | 27.71 | 8.70  | 17.47      | 10.28     | 0.62  | 1.58  | 1.39  |
|                      |                            |                                       | AUROC       | 96.31 | 43.41 | 98.13 | 99.74  | 94.61 | 98.45 | 96.90      | 98.18     | 99.80 | 99.47 | 99.56 |
| LSUN-R               |                            | FPR95                                 | 40.76       | 95.76 | 20.99 | 31.51 | 20.21  | 25.95 | 29.04 | 27.25      | 31.31     | 9.51  | 10.64 |       |
|                      |                            | AUROC                                 | 92.78       | 61.18 | 94.61 | 91.51 | 96.04  | 94.25 | 94.79 | 94.43      | 92.04     | 98.07 | 97.97 |       |
| LSUN-C               |                            | FPR95                                 | 16.10       | 98.95 | 4.57  | 0.12  | 12.68  | 3.53  | 9.57  | 4.53       | 0.15      | 0.27  | 0.20  |       |
|                      |                            | AUROC                                 | 97.41       | 42.18 | 98.87 | 99.91 | 97.49  | 99.24 | 98.29 | 99.07      | 99.79     | 99.80 | 99.89 |       |
| iSUN                 |                            | FPR95                                 | 44.69       | 94.42 | 25.30 | 35.15 | 20.29  | 30.27 | 33.48 | 31.32      | 35.65     | 10.69 | 12.98 |       |
|                      |                            | AUROC                                 | 92.00       | 63.46 | 93.60 | 90.49 | 95.94  | 93.30 | 93.79 | 93.58      | 89.21     | 97.84 | 97.79 |       |
| Textures             |                            | FPR95                                 | 45.02       | 64.96 | 44.45 | 56.99 | 14.77  | 39.38 | 35.85 | 37.23      | 54.45     | 34.33 | 24.19 |       |
|                      |                            | AUROC                                 | 40.73       | 80.71 | 82.64 | 78.33 | 96.46  | 88.30 | 92.48 | 90.35      | 84.33     | 91.98 | 94.19 |       |
| Places365            |                            | FPR95                                 | 45.54       | 81.56 | 46.67 | 54.24 | 42.07  | 36.81 | 35.20 | 37.12      | 56.25     | 26.86 | 25.60 |       |
|                      |                            | AUROC                                 | 89.20       | 69.52 | 81.96 | 80.96 | 88.27  | 88.85 | 92.32 | 89.23      | 79.56     | 93.51 | 93.81 |       |
| Average              |                            | FPR95                                 | 37.45       | 88.37 | 28.98 | 32.56 | 21.51  | 25.75 | 28.66 | 26.26      | 32.82     | 15.36 | 13.32 |       |
|                      |                            | AUROC                                 | 92.64       | 62.93 | 90.23 | 89.16 | 95.16  | 93.17 | 94.30 | 93.56      | 90.01     | 96.63 | 97.14 |       |

with 365 scene categories. There are 100 images per category in the test set, we use the entire test set for evaluation.

## B. Proof for $\mathbf{U}_k(h(\mathbf{x}) - \boldsymbol{\mu})$ coincide with $\mathbf{M}(h(\mathbf{x}) - \boldsymbol{\mu})$

Denote by  $\mathbf{z} = h(\mathbf{x})$  the feature representation for input  $\mathbf{x}$ , and  $\mathbf{U} = \{\mathbf{u}_1, \dots, \mathbf{u}_K\}$  the eigenvectors for principal directions, which is also can be viewed as orthogonal bases of principal coordinate system. View  $\mathbf{U}_k$  as a transform operator in the original feature space (*fill the dimensions that were not involved in the transformation*), we have

$$\mathbf{U}_k(h(\mathbf{x}) - \boldsymbol{\mu}) = \sum_{i=1}^k \langle \mathbf{z} - \boldsymbol{\mu}, \mathbf{u}_i \rangle \cdot \mathbf{u}_i + \sum_{j=k+1}^K 0 \cdot \mathbf{u}_j, \quad (1)$$

and after back projection, we have

$$\mathbf{M}(h(\mathbf{x}) - \boldsymbol{\mu}) = \mathbf{U}_k^T \mathbf{U}_k (h(\mathbf{x}) - \boldsymbol{\mu}) \quad (2)$$

$$= \sum_{i=1}^k \langle \mathbf{z} - \boldsymbol{\mu}, \mathbf{u}_i \rangle \cdot \langle \mathbf{u}_i, \mathbf{u}_i^T \rangle \cdot \mathbf{u}_i^T + \sum_{j=k+1}^K 0 \cdot \langle \mathbf{u}_j, \mathbf{u}_j^T \rangle \cdot \mathbf{u}_j^T \quad (3)$$

$$= \sum_{i=1}^k \langle \mathbf{z} - \boldsymbol{\mu}, \mathbf{u}_i \rangle \cdot \mathbf{u}_i^T + \sum_{j=k+1}^K 0 \cdot \mathbf{u}_j^T \quad (4)$$

$$= \mathbf{U}_k^T (h(\mathbf{x}) - \boldsymbol{\mu}) \quad (5)$$

## C. Detailed experimental results

We report the detailed performance for all seven test OOD datasets for models trained on CIFAR-10 and CIFAR-100 respectively in Table 1 and Table 2.

Table 2. Detailed results when using CIFAR-100 as ID data on seven common OOD benchmark datasets.  $\uparrow$  indicates larger values are better and  $\downarrow$  indicates smaller values are better

| OOD datasets                | Metrics       | Out-of-distribution Detection Methods |       |             |        |       |       |       |       |            |           |       |       |
|-----------------------------|---------------|---------------------------------------|-------|-------------|--------|-------|-------|-------|-------|------------|-----------|-------|-------|
|                             |               | MSP                                   | ODIN  | Mahalanobis | Energy | ViM   | ReAct | BATS  | DICE  | DICE+ReAct | LogitNorm | Ours  |       |
| CIFAR100<br>ResNet34        | SVHN          | FPR95                                 | 81.31 | 85.55       | 98.81  | 76.73 | 75.80 | 43.10 | 60.48 | 53.65      | 48.18     | 64.65 | 24.80 |
|                             |               | AUROC                                 | 77.61 | 76.83       | 54.62  | 81.52 | 82.31 | 92.22 | 89.50 | 89.97      | 91.19     | 88.69 | 95.08 |
|                             | Tiny-ImageNet | FPR95                                 | 71.07 | 63.32       | 97.83  | 60.44 | 72.18 | 54.40 | 57.77 | 62.40      | 59.99     | 18.99 | 60.34 |
|                             |               | AUROC                                 | 84.04 | 85.57       | 49.77  | 86.76 | 85.86 | 87.19 | 87.51 | 86.11      | 87.01     | 96.68 | 86.49 |
|                             | LSUN-R        | FPR95                                 | 74.39 | 38.18       | 97.38  | 58.02 | 37.70 | 41.60 | 38.64 | 85.83      | 84.17     | 93.39 | 26.96 |
|                             |               | AUROC                                 | 82.08 | 92.96       | 53.35  | 88.40 | 93.40 | 91.58 | 92.96 | 76.80      | 78.80     | 69.28 | 95.08 |
|                             | LSUN-C        | FPR95                                 | 76.52 | 68.48       | 99.48  | 61.12 | 89.49 | 52.61 | 65.69 | 32.29      | 32.01     | 10.57 | 49.64 |
|                             |               | AUROC                                 | 80.65 | 84.16       | 36.04  | 85.88 | 73.78 | 87.32 | 84.84 | 93.49      | 93.71     | 98.22 | 89.65 |
|                             | iSUN          | FPR95                                 | 75.99 | 41.92       | 94.64  | 61.82 | 38.51 | 41.95 | 40.80 | 86.01      | 82.23     | 94.39 | 28.13 |
|                             |               | AUROC                                 | 80.96 | 91.84       | 58.99  | 86.95 | 93.01 | 91.29 | 92.29 | 77.83      | 79.65     | 68.36 | 94.75 |
|                             | Textures      | FPR95                                 | 81.72 | 71.19       | 75.67  | 80.73 | 49.47 | 53.31 | 59.65 | 68.17      | 66.74     | 81.56 | 35.80 |
|                             |               | AUROC                                 | 76.90 | 79.28       | 76.95  | 77.17 | 89.33 | 87.65 | 86.59 | 82.49      | 83.96     | 74.45 | 92.53 |
|                             | Places365     | FPR95                                 | 79.81 | 78.74       | 97.17  | 78.06 | 78.09 | 70.80 | 75.13 | 82.90      | 80.26     | 80.30 | 79.83 |
|                             |               | AUROC                                 | 77.30 | 75.54       | 51.33  | 76.72 | 78.17 | 79.73 | 78.96 | 76.31      | 78.04     | 77.59 | 76.73 |
| Average                     | FPR95         | 77.26                                 | 63.91 | 94.43       | 68.13  | 63.03 | 51.11 | 56.88 | 67.32 | 64.81      | 63.41     | 43.64 |       |
|                             | AUROC         | 79.93                                 | 83.74 | 54.43       | 83.99  | 85.12 | 88.14 | 87.52 | 83.99 | 84.62      | 81.90     | 90.04 |       |
| CIFAR100<br>WideResNet28-10 | SVHN          | FPR95                                 | 81.83 | 88.35       | 54.47  | 81.09 | 49.55 | 76.69 | 79.61 | 72.91      | 84.17     | 27.40 | 59.00 |
|                             |               | AUROC                                 | 77.54 | 74.20       | 86.96  | 78.36 | 90.69 | 85.43 | 84.21 | 80.51      | 79.67     | 95.76 | 90.16 |
|                             | Tiny-ImageNet | FPR95                                 | 53.78 | 39.11       | 99.55  | 35.53 | 81.43 | 45.81 | 47.30 | 9.96       | 22.51     | 14.66 | 46.75 |
|                             |               | AUROC                                 | 89.34 | 92.87       | 32.75  | 93.62 | 83.80 | 90.60 | 90.57 | 97.69      | 95.60     | 97.43 | 89.49 |
|                             | LSUN-R        | FPR95                                 | 80.09 | 57.99       | 45.73  | 78.67 | 49.04 | 67.95 | 67.03 | 85.69      | 97.85     | 82.51 | 50.05 |
|                             |               | AUROC                                 | 77.38 | 86.38       | 90.28  | 80.34 | 90.31 | 84.54 | 85.15 | 79.72      | 53.43     | 79.00 | 89.40 |
|                             | LSUN-C        | FPR95                                 | 64.57 | 54.16       | 99.59  | 46.02 | 68.64 | 54.87 | 60.83 | 6.21       | 6.58      | 4.80  | 44.67 |
|                             |               | AUROC                                 | 86.67 | 90.64       | 26.74  | 92.25 | 86.55 | 89.83 | 87.03 | 98.61      | 98.53     | 99.07 | 91.87 |
|                             | iSUN          | FPR95                                 | 81.62 | 58.69       | 45.46  | 80.96 | 44.45 | 67.93 | 68.89 | 88.65      | 98.51     | 84.67 | 46.16 |
|                             |               | AUROC                                 | 76.98 | 86.06       | 90.26  | 79.49 | 90.82 | 84.75 | 84.86 | 78.08      | 54.78     | 77.78 | 90.22 |
|                             | Textures      | FPR95                                 | 80.66 | 75.09       | 33.58  | 78.09 | 33.00 | 66.26 | 70.01 | 77.29      | 72.80     | 69.43 | 37.73 |
|                             |               | AUROC                                 | 77.19 | 78.09       | 91.82  | 78.16 | 93.14 | 85.85 | 84.58 | 76.52      | 74.21     | 80.46 | 91.82 |
|                             | Places365     | FPR95                                 | 78.41 | 76.63       | 93.51  | 79.50 | 82.91 | 75.64 | 77.29 | 82.64      | 92.81     | 75.12 | 78.19 |
|                             |               | AUROC                                 | 78.40 | 78.34       | 59.38  | 77.97 | 76.32 | 81.36 | 80.47 | 76.15      | 62.69     | 81.06 | 79.60 |
| Average                     | FPR95         | 74.42                                 | 64.29 | 66.99       | 68.55  | 58.43 | 65.02 | 67.28 | 60.48 | 67.89      | 51.23     | 51.79 |       |
|                             | AUROC         | 80.50                                 | 83.80 | 68.31       | 82.88  | 87.37 | 86.05 | 85.27 | 83.90 | 74.13      | 87.22     | 88.94 |       |
